# Supplementary material for: Development and Validation of a Novel Hypoxia-Related Long Noncoding RNA Model With Regard to Prognosis and Immune Features in Breast Cancer
Source: Front Cell Dev Biol. 2021 Dec 16;9:796729. doi: 10.3389/fcell.2021.796729 (PMC8716768; doi:10.3389/fcell.2021.796729)
Supplement: Supplementary file 10 [file Table6.xlsx]

## Sheet: HRLs
Hypoxia-related lncRNAs in the co-expression network
Overlapped	Current research	Zhao et al.
34	166	76
AC093278.2	MIR1-1HG	LINC01614
MIR22HG	TBX5-AS1	USP30-AS1
AL136084.3	AC087482.1	AC002546.1
LINC01711	AP000695.1	AL121760.1
AC004585.1	AC005291.2	AL136084.3
YTHDF3-AS1	IER3-AS1	AC068580.3
LINC00511	LINC01638	LINC00511
LINC01615	AC000403.1	AC109361.2
AP000695.1	TCERG1L-AS1	MIR210HG
AC009093.1	LINC02544	AC008115.3
AC020765.2	LINC00922	AC020663.2
MIR4435-2HG	MAGI2-AS3	AP001528.2
MIR100HG	AL109741.1	AC112721.2
LINC01857	AC134312.5	MIR99AHG
AC009686.2	LINC02202	MAGI2-AS3
AC020663.2	AC093278.2	AC138696.2
AL121832.2	LINC01561	AC006329.1
AC092718.4	LINC01614	DLEU2
SNHG25	AL049838.1	AL691482.3
MIR155HG	AP003071.4	AC009093.1
ACTA2-AS1	AC005291.1	AL139393.2
LINC00922	LINC01197	LINC02568
LINC02568	AC020916.1	AL049838.1
MAGI2-AS3	AC009686.2	MIR4435-2HG
AC020916.1	SH3RF3-AS1	MIAT
LINC02544	NR4A1AS	AC016888.1
AC104667.2	AL445426.1	SIAH2-AS1
AL049838.1	AC112715.1	MIR155HG
AC134312.5	AC243960.1	TRBV11-2
LINC01614	SIAH2-AS1	HCG11
MIR210HG	LINC02823	YTHDF3-AS1
TDRKH-AS1	OTUD6B-AS1	AC024075.1
LINC00504	AP001189.3	AF178030.1
SIAH2-AS1	CADM3-AS1	AL121790.2
	AC121338.2	AL121832.2
	AP000695.2	LINC00922
	LINC00941	AC020916.1
	AL590226.1	AL031316.1
	LINC00702	LINC01857
	LINC01857	LINC01711
	AL035661.1	AC092801.1
	MSC-AS1	LINC02446
	MYOSLID	AC004585.1
	TRG-AS1	AL356311.1
	AC004585.1	LINC01929
	AC062004.1	MIR100HG
	ZFHX4-AS1	AC068580.1
	PTPRD-AS1	LINC01705
	LINC01023	SNHG26
	AC068473.4	AC025259.3
	AC010247.2	AL513283.1
	HSD11B1-AS1	MIR22HG
	LINC02185	LINC01235
	IL6-AS1	TDRKH-AS1
	AL136084.3	AC121757.1
	EMX2OS	SNHG25
	MIR155HG	AC091057.1
	LINC00996	AC004687.1
	LINC01281	LINC00504
	LINC01978	AC012073.1
	LINC02273	AC092718.4
	AC135178.2	SOX9-AS1
	AL139393.3	AC009686.2
	AC104667.2	AC020765.2
	LINC02084	LINC01094
	MIR22HG	LINC01615
	AF015262.1	AC124312.5
	AC004847.1	AC093278.2
	LINC02568	ACTA2-AS1
	AC008771.1	AC022509.3
	MIR100HG	LINC02544
	LINC02812	MEG3
	AP001434.1	AP000695.1
	LINC01711	AC106782.2
	LINC01615	AC104667.2
	AC009093.1	AC134312.5
	RNF157-AS1
	AC027288.3
	HAS2-AS1
	AP003774.2
	AC007998.3
	AC010331.1
	AC006942.1
	AC080038.2
	LINC00924
	LINC00892
	AL590764.1
	AL138995.1
	CARD8-AS1
	AC096921.2
	AC008915.3
	AC009093.2
	AC026801.2
	YTHDF3-AS1
	AC092718.4
	TRHDE-AS1
	HCG20
	AL122035.1
	AC133552.5
	AC040169.1
	AC007728.2
	AC023509.3
	AL133415.1
	LINC00243
	AC025175.1
	AC125807.2
	AL512380.1
	AC044849.1
	DDX11-AS1
	AL390294.1
	FAM30A
	LINC02384
	LINC00840
	AC110995.1
	AC011978.2
	LINC01985
	AC036214.2
	AC068888.1
	SNHG25
	AC008555.4
	LINC00511
	LINC02416
	AL132639.2
	SPINT1-AS1
	NRAV
	LINC01352
	BX322562.1
	TUBA3FP
	AC233992.3
	AL109955.1
	CD2BP2-DT
	AC024909.1
	LINC01485
	LINC01311
	MIR210HG
	AL451085.3
	SLC12A5-AS1
	IQCH-AS1
	AC020765.2
	MIR3945HG
	AJ011932.1
	AL844908.1
	MIR223HG
	GATA3-AS1
	SENCR
	AL591895.1
	TDRKH-AS1
	PXN-AS1
	LNCOG
	LINC00504
	AL691482.4
	AC069281.2
	MIR4435-2HG
	ACTA2-AS1
	HDAC4-AS1
	AL445423.1
	AL121832.2
	CDK6-AS1
	PAXIP1-AS2
	AC074212.1
	SNHG9
	AL355353.2
	AC020663.2
	AC090125.1
	SGMS1-AS1
	AL133355.1
		THEIR
		43
		AC024075.1
		AC121757.1
		AC124312.5
		AC012073.1
		AC106782.2
		SNHG26
		AP001528.2
		AC008115.3
		AC109361.2
		HCG11
		AC112721.2
		MIR99AHG
		DLEU2
		AC006329.1
		AL121790.2
		AC016888.1
		MEG3
		USP30-AS1
		AC025259.3
		LINC01929
		MIAT
		LINC01705
		LINC01094
		AC002546.1
		SOX9-AS1
		AL691482.3
		LINC01235
		AC092801.1
		AC091057.1
		AC022509.3
		lncRNAs
		AF178030.1
		AC068580.3
		AL513283.1
		LINC02446
		AL356311.1
		AC068580.1
		AL139393.2
		AC138696.2
		AL121760.1
		AL031316.1
		AC004687.1
		TRBV11-2
		THEIR
		43
		AC024075.1
		AC121757.1
		AC124312.5
		AC012073.1
		AC106782.2
		SNHG26
		AP001528.2
		AC008115.3
		AC109361.2
		HCG11
		AC112721.2
		MIR99AHG
		DLEU2
		AC006329.1
		AL121790.2
		AC016888.1
		MEG3
		USP30-AS1
		AC025259.3
		LINC01929
		MIAT
		LINC01705
		LINC01094
		AC002546.1
		SOX9-AS1
		AL691482.3
		LINC01235
		AC092801.1
		AC091057.1
		AC022509.3
		lncRNAs
		AF178030.1
		AC068580.3
		AL513283.1
		LINC02446
		AL356311.1
		AC068580.1
		AL139393.2
		AC138696.2
		AL121760.1
		AL031316.1
		AC004687.1
		TRBV11-2
		THEIR
		43
		AC024075.1
		AC121757.1
		AC124312.5
		AC012073.1
		AC106782.2
		SNHG26
		AP001528.2
		AC008115.3
		AC109361.2
		HCG11
		AC112721.2
		MIR99AHG
		DLEU2
		AC006329.1
		AL121790.2
		AC016888.1
		MEG3
		USP30-AS1
		AC025259.3
		LINC01929
		MIAT
		LINC01705
		LINC01094
		AC002546.1
		SOX9-AS1
		AL691482.3
		LINC01235
		AC092801.1
		AC091057.1
		AC022509.3
		lncRNAs
		AF178030.1
		AC068580.3
		AL513283.1
		LINC02446
		AL356311.1
		AC068580.1
		AL139393.2
		AC138696.2
		AL121760.1
		AL031316.1
		AC004687.1
		TRBV11-2
		THEIR
		43
		AC024075.1
		AC121757.1
		AC124312.5
		AC012073.1
		AC106782.2
		SNHG26
		AP001528.2
		AC008115.3
		AC109361.2
		HCG11
		AC112721.2
		MIR99AHG
		DLEU2
		AC006329.1
		AL121790.2
		AC016888.1
		MEG3
		USP30-AS1
		AC025259.3
		LINC01929
		MIAT
		LINC01705
		LINC01094
		AC002546.1
		SOX9-AS1
		AL691482.3
		LINC01235
		AC092801.1
		AC091057.1
		AC022509.3
		lncRNAs
		AF178030.1
		AC068580.3
		AL513283.1
		LINC02446
		AL356311.1
		AC068580.1
		AL139393.2
		AC138696.2
		AL121760.1
		AL031316.1
		AC004687.1
		TRBV11-2
		THEIR
		43
		AC024075.1
		AC121757.1
		AC124312.5
		AC012073.1
		AC106782.2
		SNHG26
		AP001528.2
		AC008115.3
		AC109361.2
		HCG11
		AC112721.2
		MIR99AHG
		DLEU2
		AC006329.1
		AL121790.2
		AC016888.1
		MEG3
		USP30-AS1
		AC025259.3
		LINC01929
		MIAT
		LINC01705
		LINC01094
		AC002546.1
		SOX9-AS1
		AL691482.3
		LINC01235
		AC092801.1
		AC091057.1
		AC022509.3
		lncRNAs
		AF178030.1
		AC068580.3
		AL513283.1
		LINC02446
		AL356311.1
		AC068580.1
		AL139393.2
		AC138696.2
		AL121760.1
		AL031316.1
		AC004687.1
		TRBV11-2
		THEIR
		43
		AC024075.1
		AC121757.1
		AC124312.5
		AC012073.1
		AC106782.2
		SNHG26
		AP001528.2
		AC008115.3
		AC109361.2
		HCG11
		AC112721.2
		MIR99AHG
		DLEU2
		AC006329.1
		AL121790.2
		AC016888.1
		MEG3
		USP30-AS1
		AC025259.3
		LINC01929
		MIAT
		LINC01705
		LINC01094
		AC002546.1
		SOX9-AS1
		AL691482.3
		LINC01235
		AC092801.1
		AC091057.1
		AC022509.3
		lncRNAs
		AF178030.1
		AC068580.3
		AL513283.1
		LINC02446
		AL356311.1
		AC068580.1
		AL139393.2
		AC138696.2
		AL121760.1
		AL031316.1
		AC004687.1
		TRBV11-2
		THEIR
		43
		AC024075.1
		AC121757.1
		AC124312.5
		AC012073.1
		AC106782.2
		SNHG26
		AP001528.2
		AC008115.3
		AC109361.2
		HCG11
		AC112721.2
		MIR99AHG
		DLEU2
		AC006329.1
		AL121790.2
		AC016888.1
		MEG3
		USP30-AS1
		AC025259.3
		LINC01929
		MIAT
		LINC01705
		LINC01094
		AC002546.1
		SOX9-AS1
		AL691482.3
		LINC01235
		AC092801.1
		AC091057.1
		AC022509.3
		lncRNAs
		AF178030.1
		AC068580.3
		AL513283.1
		LINC02446
		AL356311.1
		AC068580.1
		AL139393.2
		AC138696.2
		AL121760.1
		AL031316.1
		AC004687.1
		TRBV11-2
		THEIR
		43
		AC024075.1
		AC121757.1
		AC124312.5
		AC012073.1
		AC106782.2
		SNHG26
		AP001528.2
		AC008115.3
		AC109361.2
		HCG11
		AC112721.2
		MIR99AHG
		DLEU2
		AC006329.1
		AL121790.2
		AC016888.1
		MEG3
		USP30-AS1
		AC025259.3
		LINC01929
		MIAT
		LINC01705
		LINC01094
		AC002546.1
		SOX9-AS1
		AL691482.3
		LINC01235
		AC092801.1
		AC091057.1
		AC022509.3
		lncRNAs
		AF178030.1
		AC068580.3
		AL513283.1
		LINC02446
		AL356311.1
		AC068580.1
		AL139393.2
		AC138696.2
		AL121760.1
		AL031316.1
		AC004687.1
		TRBV11-2
		THEIR
		43
		AC024075.1
		AC121757.1
		AC124312.5
		AC012073.1
		AC106782.2
		SNHG26
		AP001528.2
		AC008115.3
		AC109361.2
		HCG11
		AC112721.2
		MIR99AHG
		DLEU2
		AC006329.1
		AL121790.2
		AC016888.1
		MEG3
		USP30-AS1
		AC025259.3
		LINC01929
		MIAT
		LINC01705
		LINC01094
		AC002546.1
		SOX9-AS1
		AL691482.3
		LINC01235
		AC092801.1
		AC091057.1
		AC022509.3
		lncRNAs
		AF178030.1
		AC068580.3
		AL513283.1
		LINC02446
		AL356311.1
		AC068580.1
		AL139393.2
		AC138696.2
		AL121760.1
		AL031316.1
		AC004687.1
		TRBV11-2
		THEIR
		43
		AC024075.1
		AC121757.1
		AC124312.5
		AC012073.1
		AC106782.2
		SNHG26
		AP001528.2
		AC008115.3
		AC109361.2
		HCG11
		AC112721.2
		MIR99AHG
		DLEU2
		AC006329.1
		AL121790.2
		AC016888.1
		MEG3
		USP30-AS1
		AC025259.3
		LINC01929
		MIAT
		LINC01705
		LINC01094
		AC002546.1
		SOX9-AS1
		AL691482.3
		LINC01235
		AC092801.1
		AC091057.1
		AC022509.3
		lncRNAs
		AF178030.1
		AC068580.3
		AL513283.1
		LINC02446
		AL356311.1
		AC068580.1
		AL139393.2
		AC138696.2
		AL121760.1
		AL031316.1
		AC004687.1
		TRBV11-2
		THEIR
		43
		AC024075.1
		AC121757.1
		AC124312.5
		AC012073.1
		AC106782.2
		SNHG26
		AP001528.2
		AC008115.3
		AC109361.2
		HCG11
		AC112721.2
		MIR99AHG
		DLEU2
		AC006329.1
		AL121790.2
		AC016888.1
		MEG3
		USP30-AS1
		AC025259.3
		LINC01929
		MIAT
		LINC01705
		LINC01094
		AC002546.1
		SOX9-AS1
		AL691482.3
		LINC01235
		AC092801.1
		AC091057.1
		AC022509.3
		lncRNAs
		AF178030.1
		AC068580.3
		AL513283.1
		LINC02446
		AL356311.1
		AC068580.1
		AL139393.2
		AC138696.2
		AL121760.1
		AL031316.1
		AC004687.1
		TRBV11-2
		THEIR
		43
		AC024075.1
		AC121757.1
		AC124312.5
		AC012073.1
		AC106782.2
		SNHG26
		AP001528.2
		AC008115.3
		AC109361.2
		HCG11
		AC112721.2
		MIR99AHG
		DLEU2
		AC006329.1
		AL121790.2
		AC016888.1
		MEG3
		USP30-AS1
		AC025259.3
		LINC01929
		MIAT
		LINC01705
		LINC01094
		AC002546.1
		SOX9-AS1
		AL691482.3
		LINC01235
		AC092801.1
		AC091057.1
		AC022509.3
		lncRNAs
		AF178030.1
		AC068580.3
		AL513283.1
		LINC02446
		AL356311.1
		AC068580.1
		AL139393.2
		AC138696.2
		AL121760.1
		AL031316.1
		AC004687.1
		TRBV11-2
		THEIR
		43
		AC024075.1
		AC121757.1
		AC124312.5
		AC012073.1
		AC106782.2
		SNHG26
		AP001528.2
		AC008115.3
		AC109361.2
		HCG11
		AC112721.2
		MIR99AHG
		DLEU2
		AC006329.1
		AL121790.2
		AC016888.1
		MEG3
		USP30-AS1
		AC025259.3
		LINC01929
		MIAT
		LINC01705
		LINC01094
		AC002546.1
		SOX9-AS1
		AL691482.3
		LINC01235
		AC092801.1
		AC091057.1
		AC022509.3
		lncRNAs
		AF178030.1
		AC068580.3
		AL513283.1
		LINC02446
		AL356311.1
		AC068580.1
		AL139393.2
		AC138696.2
		AL121760.1
		AL031316.1
		AC004687.1
		TRBV11-2
		THEIR
		43
		AC024075.1
		AC121757.1
		AC124312.5
		AC012073.1
		AC106782.2
		SNHG26
		AP001528.2
		AC008115.3
		AC109361.2
		HCG11
		AC112721.2
		MIR99AHG
		DLEU2
		AC006329.1
		AL121790.2
		AC016888.1
		MEG3
		USP30-AS1
		AC025259.3
		LINC01929
		MIAT
		LINC01705
		LINC01094
		AC002546.1
		SOX9-AS1
		AL691482.3
		LINC01235
		AC092801.1
		AC091057.1
		AC022509.3
		lncRNAs
		AF178030.1
		AC068580.3
		AL513283.1
		LINC02446
		AL356311.1
		AC068580.1
		AL139393.2
		AC138696.2
		AL121760.1
		AL031316.1
		AC004687.1
		TRBV11-2
		THEIR
		43
		AC024075.1
		AC121757.1
		AC124312.5
		AC012073.1
		AC106782.2
		SNHG26
		AP001528.2
		AC008115.3
		AC109361.2
		HCG11
		AC112721.2
		MIR99AHG
		DLEU2
		AC006329.1
		AL121790.2
		AC016888.1
		MEG3
		USP30-AS1
		AC025259.3
		LINC01929
		MIAT
		LINC01705
		LINC01094
		AC002546.1
		SOX9-AS1
		AL691482.3
		LINC01235
		AC092801.1
		AC091057.1
		AC022509.3
		lncRNAs
		AF178030.1
		AC068580.3
		AL513283.1
		LINC02446
		AL356311.1
		AC068580.1
		AL139393.2
		AC138696.2
		AL121760.1
		AL031316.1
		AC004687.1
		TRBV11-2
		THEIR
		43
		AC024075.1
		AC121757.1
		AC124312.5
		AC012073.1
		AC106782.2
		SNHG26
		AP001528.2
		AC008115.3
		AC109361.2
		HCG11
		AC112721.2
		MIR99AHG
		DLEU2
		AC006329.1
		AL121790.2
		AC016888.1
		MEG3
		USP30-AS1
		AC025259.3
		LINC01929
		MIAT
		LINC01705
		LINC01094
		AC002546.1
		SOX9-AS1
		AL691482.3
		LINC01235
		AC092801.1
		AC091057.1
		AC022509.3
		lncRNAs
		AF178030.1
		AC068580.3
		AL513283.1
		LINC02446
		AL356311.1
		AC068580.1
		AL139393.2
		AC138696.2
		AL121760.1
		AL031316.1
		AC004687.1
		TRBV11-2
		THEIR
		43
		AC024075.1
		AC121757.1
		AC124312.5
		AC012073.1
		AC106782.2
		SNHG26
		AP001528.2
		AC008115.3
		AC109361.2
		HCG11
		AC112721.2
		MIR99AHG
		DLEU2
		AC006329.1
		AL121790.2
		AC016888.1
		MEG3
		USP30-AS1
		AC025259.3
		LINC01929
		MIAT
		LINC01705
		LINC01094
		AC002546.1
		SOX9-AS1
		AL691482.3
		LINC01235
		AC092801.1
		AC091057.1
		AC022509.3
		lncRNAs
		AF178030.1
		AC068580.3
		AL513283.1
		LINC02446
		AL356311.1
		AC068580.1
		AL139393.2
		AC138696.2
		AL121760.1
		AL031316.1
		AC004687.1
		TRBV11-2
		THEIR
		43
		AC024075.1
		AC121757.1
		AC124312.5
		AC012073.1
		AC106782.2
		SNHG26
		AP001528.2
		AC008115.3
		AC109361.2
		HCG11
		AC112721.2
		MIR99AHG
		DLEU2
		AC006329.1
		AL121790.2
		AC016888.1
		MEG3
		USP30-AS1
		AC025259.3
		LINC01929
		MIAT
		LINC01705
		LINC01094
		AC002546.1
		SOX9-AS1
		AL691482.3
		LINC01235
		AC092801.1
		AC091057.1
		AC022509.3
		lncRNAs
		AF178030.1
		AC068580.3
		AL513283.1
		LINC02446
		AL356311.1
		AC068580.1
		AL139393.2
		AC138696.2
		AL121760.1
		AL031316.1
		AC004687.1
		TRBV11-2
		THEIR
		43
		AC024075.1
		AC121757.1
		AC124312.5
		AC012073.1
		AC106782.2
		SNHG26
		AP001528.2
		AC008115.3
		AC109361.2
		HCG11
		AC112721.2
		MIR99AHG
		DLEU2
		AC006329.1
		AL121790.2
		AC016888.1
		MEG3
		USP30-AS1
		AC025259.3
		LINC01929
		MIAT
		LINC01705
		LINC01094
		AC002546.1
		SOX9-AS1
		AL691482.3
		LINC01235
		AC092801.1
		AC091057.1
		AC022509.3
		lncRNAs
		AF178030.1
		AC068580.3
		AL513283.1
		LINC02446
		AL356311.1
		AC068580.1
		AL139393.2
		AC138696.2
		AL121760.1
		AL031316.1
		AC004687.1
		TRBV11-2
		THEIR
		43
		AC024075.1
		AC121757.1
		AC124312.5
		AC012073.1
		AC106782.2
		SNHG26
		AP001528.2
		AC008115.3
		AC109361.2
		HCG11
		AC112721.2
		MIR99AHG
		DLEU2
		AC006329.1
		AL121790.2
		AC016888.1
		MEG3
		USP30-AS1
		AC025259.3
		LINC01929
		MIAT
		LINC01705
		LINC01094
		AC002546.1
		SOX9-AS1
		AL691482.3
		LINC01235
		AC092801.1
		AC091057.1
		AC022509.3
		lncRNAs
		AF178030.1
		AC068580.3
		AL513283.1
		LINC02446
		AL356311.1
		AC068580.1
		AL139393.2
		AC138696.2
		AL121760.1
		AL031316.1
		AC004687.1
		TRBV11-2
		THEIR
		43
		AC024075.1
		AC121757.1
		AC124312.5
		AC012073.1
		AC106782.2
		SNHG26
		AP001528.2
		AC008115.3
		AC109361.2
		HCG11
		AC112721.2
		MIR99AHG
		DLEU2
		AC006329.1
		AL121790.2
		AC016888.1
		MEG3
		USP30-AS1
		AC025259.3
		LINC01929
		MIAT
		LINC01705
		LINC01094
		AC002546.1
		SOX9-AS1
		AL691482.3
		LINC01235
		AC092801.1
		AC091057.1
		AC022509.3
		lncRNAs
		AF178030.1
		AC068580.3
		AL513283.1
		LINC02446
		AL356311.1
		AC068580.1
		AL139393.2
		AC138696.2
		AL121760.1
		AL031316.1
		AC004687.1
		TRBV11-2
		THEIR
		43
		AC024075.1
		AC121757.1
		AC124312.5
		AC012073.1
		AC106782.2
		SNHG26
		AP001528.2
		AC008115.3
		AC109361.2
		HCG11
		AC112721.2
		MIR99AHG
		DLEU2
		AC006329.1
		AL121790.2
		AC016888.1
		MEG3
		USP30-AS1
		AC025259.3
		LINC01929
		MIAT
		LINC01705
		LINC01094
		AC002546.1
		SOX9-AS1
		AL691482.3
		LINC01235
		AC092801.1
		AC091057.1
		AC022509.3
		lncRNAs
		AF178030.1
		AC068580.3
		AL513283.1
		LINC02446
		AL356311.1
		AC068580.1
		AL139393.2
		AC138696.2
		AL121760.1
		AL031316.1
		AC004687.1
		TRBV11-2
		THEIR
		43
		AC024075.1
		AC121757.1
		AC124312.5
		AC012073.1
		AC106782.2
		SNHG26
		AP001528.2
		AC008115.3
		AC109361.2
		HCG11
		AC112721.2
		MIR99AHG
		DLEU2
		AC006329.1
		AL121790.2
		AC016888.1
		MEG3
		USP30-AS1
		AC025259.3
		LINC01929
		MIAT
		LINC01705
		LINC01094
		AC002546.1
		SOX9-AS1
		AL691482.3
		LINC01235
		AC092801.1
		AC091057.1
		AC022509.3
		lncRNAs
		AF178030.1
		AC068580.3
		AL513283.1
		LINC02446
		AL356311.1
		AC068580.1
		AL139393.2
		AC138696.2
		AL121760.1
		AL031316.1
		AC004687.1
		TRBV11-2
		THEIR
		43
		AC024075.1
		AC121757.1
		AC124312.5
		AC012073.1
		AC106782.2
		SNHG26
		AP001528.2
		AC008115.3
		AC109361.2
		HCG11
		AC112721.2
		MIR99AHG
		DLEU2
		AC006329.1
		AL121790.2
		AC016888.1
		MEG3
		USP30-AS1
		AC025259.3
		LINC01929
		MIAT
		LINC01705
		LINC01094
		AC002546.1
		SOX9-AS1
		AL691482.3
		LINC01235
		AC092801.1
		AC091057.1
		AC022509.3
		lncRNAs
		AF178030.1
		AC068580.3
		AL513283.1
		LINC02446
		AL356311.1
		AC068580.1
		AL139393.2
		AC138696.2
		AL121760.1
		AL031316.1
		AC004687.1
		TRBV11-2
		THEIR
		43
		AC024075.1
		AC121757.1
		AC124312.5
		AC012073.1
		AC106782.2
		SNHG26
		AP001528.2
		AC008115.3
		AC109361.2
		HCG11
		AC112721.2
		MIR99AHG
		DLEU2
		AC006329.1
		AL121790.2
		AC016888.1
		MEG3
		USP30-AS1
		AC025259.3
		LINC01929
		MIAT
		LINC01705
		LINC01094
		AC002546.1
		SOX9-AS1
		AL691482.3
		LINC01235
		AC092801.1
		AC091057.1
		AC022509.3
		lncRNAs
		AF178030.1
		AC068580.3
		AL513283.1
		LINC02446
		AL356311.1
		AC068580.1
		AL139393.2
		AC138696.2
		AL121760.1
		AL031316.1
		AC004687.1
		TRBV11-2
		THEIR
		43
		AC024075.1
		AC121757.1
		AC124312.5
		AC012073.1
		AC106782.2
		SNHG26
		AP001528.2
		AC008115.3
		AC109361.2
		HCG11
		AC112721.2
		MIR99AHG
		DLEU2
		AC006329.1
		AL121790.2
		AC016888.1
		MEG3
		USP30-AS1
		AC025259.3
		LINC01929
		MIAT
		LINC01705
		LINC01094
		AC002546.1
		SOX9-AS1
		AL691482.3
		LINC01235
		AC092801.1
		AC091057.1
		AC022509.3
		lncRNAs
		AF178030.1
		AC068580.3
		AL513283.1
		LINC02446
		AL356311.1
		AC068580.1
		AL139393.2
		AC138696.2
		AL121760.1
		AL031316.1
		AC004687.1
		TRBV11-2
		THEIR
		43
		AC024075.1
		AC121757.1
		AC124312.5
		AC012073.1
		AC106782.2
		SNHG26
		AP001528.2
		AC008115.3
		AC109361.2
		HCG11
		AC112721.2
		MIR99AHG
		DLEU2
		AC006329.1
		AL121790.2
		AC016888.1
		MEG3
		USP30-AS1
		AC025259.3
		LINC01929
		MIAT
		LINC01705
		LINC01094
		AC002546.1
		SOX9-AS1
		AL691482.3
		LINC01235
		AC092801.1
		AC091057.1
		AC022509.3
		lncRNAs
		AF178030.1
		AC068580.3
		AL513283.1
		LINC02446
		AL356311.1
		AC068580.1
		AL139393.2
		AC138696.2
		AL121760.1
		AL031316.1
		AC004687.1
		TRBV11-2
		THEIR
		43
		AC024075.1
		AC121757.1
		AC124312.5
		AC012073.1
		AC106782.2
		SNHG26
		AP001528.2
		AC008115.3
		AC109361.2
		HCG11
		AC112721.2
		MIR99AHG
		DLEU2
		AC006329.1
		AL121790.2
		AC016888.1
		MEG3
		USP30-AS1
		AC025259.3
		LINC01929
		MIAT
		LINC01705
		LINC01094
		AC002546.1
		SOX9-AS1
		AL691482.3
		LINC01235
		AC092801.1
		AC091057.1
		AC022509.3
		lncRNAs
		AF178030.1
		AC068580.3
		AL513283.1
		LINC02446
		AL356311.1
		AC068580.1
		AL139393.2
		AC138696.2
		AL121760.1
		AL031316.1
		AC004687.1
		TRBV11-2
		THEIR
		43
		AC024075.1
		AC121757.1
		AC124312.5
		AC012073.1
		AC106782.2
		SNHG26
		AP001528.2
		AC008115.3
		AC109361.2
		HCG11
		AC112721.2
		MIR99AHG
		DLEU2
		AC006329.1
		AL121790.2
		AC016888.1
		MEG3
		USP30-AS1
		AC025259.3
		LINC01929
		MIAT
		LINC01705
		LINC01094
		AC002546.1
		SOX9-AS1
		AL691482.3
		LINC01235
		AC092801.1
		AC091057.1
		AC022509.3
		lncRNAs
		AF178030.1
		AC068580.3
		AL513283.1
		LINC02446
		AL356311.1
		AC068580.1
		AL139393.2
		AC138696.2
		AL121760.1
		AL031316.1
		AC004687.1
		TRBV11-2
		THEIR
		43
		AC024075.1
		AC121757.1
		AC124312.5
		AC012073.1
		AC106782.2
		SNHG26
		AP001528.2
		AC008115.3
		AC109361.2
		HCG11
		AC112721.2
		MIR99AHG
		DLEU2
		AC006329.1
		AL121790.2
		AC016888.1
		MEG3
		USP30-AS1
		AC025259.3
		LINC01929
		MIAT
		LINC01705
		LINC01094
		AC002546.1
		SOX9-AS1
		AL691482.3
		LINC01235
		AC092801.1
		AC091057.1
		AC022509.3
		lncRNAs
		AF178030.1
		AC068580.3
		AL513283.1
		LINC02446
		AL356311.1
		AC068580.1
		AL139393.2
		AC138696.2
		AL121760.1
		AL031316.1
		AC004687.1
		TRBV11-2
		THEIR
		43
		AC024075.1
		AC121757.1
		AC124312.5
		AC012073.1
		AC106782.2
		SNHG26
		AP001528.2
		AC008115.3
		AC109361.2
		HCG11
		AC112721.2
		MIR99AHG
		DLEU2
		AC006329.1
		AL121790.2
		AC016888.1
		MEG3
		USP30-AS1
		AC025259.3
		LINC01929
		MIAT
		LINC01705
		LINC01094
		AC002546.1
		SOX9-AS1
		AL691482.3
		LINC01235
		AC092801.1
		AC091057.1
		AC022509.3
		lncRNAs
		AF178030.1
		AC068580.3
		AL513283.1
		LINC02446
		AL356311.1
		AC068580.1
		AL139393.2
		AC138696.2
		AL121760.1
		AL031316.1
		AC004687.1
		TRBV11-2
		THEIR
		43
		AC024075.1
		AC121757.1
		AC124312.5
		AC012073.1
		AC106782.2
		SNHG26
		AP001528.2
		AC008115.3
		AC109361.2
		HCG11
		AC112721.2
		MIR99AHG
		DLEU2
		AC006329.1
		AL121790.2
		AC016888.1
		MEG3
		USP30-AS1
		AC025259.3
		LINC01929
		MIAT
		LINC01705
		LINC01094
		AC002546.1
		SOX9-AS1
		AL691482.3
		LINC01235
		AC092801.1
		AC091057.1
		AC022509.3
		lncRNAs
		AF178030.1
		AC068580.3
		AL513283.1
		LINC02446
		AL356311.1
		AC068580.1
		AL139393.2
		AC138696.2
		AL121760.1
		AL031316.1
		AC004687.1
		TRBV11-2
		THEIR
		43
		AC024075.1
		AC121757.1
		AC124312.5
		AC012073.1
		AC106782.2
		SNHG26
		AP001528.2
		AC008115.3
		AC109361.2
		HCG11
		AC112721.2
		MIR99AHG
		DLEU2
		AC006329.1
		AL121790.2
		AC016888.1
		MEG3
		USP30-AS1
		AC025259.3
		LINC01929
		MIAT
		LINC01705
		LINC01094
		AC002546.1
		SOX9-AS1
		AL691482.3
		LINC01235
		AC092801.1
		AC091057.1
		AC022509.3
		lncRNAs
		AF178030.1
		AC068580.3
		AL513283.1
		LINC02446
		AL356311.1
		AC068580.1
		AL139393.2
		AC138696.2
		AL121760.1
		AL031316.1
		AC004687.1
		TRBV11-2
		THEIR
		43
		AC024075.1
		AC121757.1
		AC124312.5
		AC012073.1
		AC106782.2
		SNHG26
		AP001528.2
		AC008115.3
		AC109361.2
		HCG11
		AC112721.2
		MIR99AHG
		DLEU2
		AC006329.1
		AL121790.2
		AC016888.1
		MEG3
		USP30-AS1
		AC025259.3
		LINC01929
		MIAT
		LINC01705
		LINC01094
		AC002546.1
		SOX9-AS1
		AL691482.3
		LINC01235
		AC092801.1
		AC091057.1
		AC022509.3
		lncRNAs
		AF178030.1
		AC068580.3
		AL513283.1
		LINC02446
		AL356311.1
		AC068580.1
		AL139393.2
		AC138696.2
		AL121760.1
		AL031316.1
		AC004687.1
		TRBV11-2
		THEIR
		43
		AC024075.1
		AC121757.1
		AC124312.5
		AC012073.1
		AC106782.2
		SNHG26
		AP001528.2
		AC008115.3
		AC109361.2
		HCG11
		AC112721.2
		MIR99AHG
		DLEU2
		AC006329.1
		AL121790.2
		AC016888.1
		MEG3
		USP30-AS1
		AC025259.3
		LINC01929
		MIAT
		LINC01705
		LINC01094
		AC002546.1
		SOX9-AS1
		AL691482.3
		LINC01235
		AC092801.1
		AC091057.1
		AC022509.3
		lncRNAs
		AF178030.1
		AC068580.3
		AL513283.1
		LINC02446
		AL356311.1
		AC068580.1
		AL139393.2
		AC138696.2
		AL121760.1
		AL031316.1
		AC004687.1
		TRBV11-2
		THEIR
		43
		AC024075.1
		AC121757.1
		AC124312.5
		AC012073.1
		AC106782.2
		SNHG26
		AP001528.2
		AC008115.3
		AC109361.2
		HCG11
		AC112721.2
		MIR99AHG
		DLEU2
		AC006329.1
		AL121790.2
		AC016888.1
		MEG3
		USP30-AS1
		AC025259.3
		LINC01929
		MIAT
		LINC01705
		LINC01094
		AC002546.1
		SOX9-AS1
		AL691482.3
		LINC01235
		AC092801.1
		AC091057.1
		AC022509.3
		lncRNAs
		AF178030.1
		AC068580.3
		AL513283.1
		LINC02446
		AL356311.1
		AC068580.1
		AL139393.2
		AC138696.2
		AL121760.1
		AL031316.1
		AC004687.1
		TRBV11-2
		THEIR
		43
		AC024075.1
		AC121757.1
		AC124312.5
		AC012073.1
		AC106782.2
		SNHG26
		AP001528.2
		AC008115.3
		AC109361.2
		HCG11
		AC112721.2
		MIR99AHG
		DLEU2
		AC006329.1
		AL121790.2
		AC016888.1
		MEG3
		USP30-AS1
		AC025259.3
		LINC01929
		MIAT
		LINC01705
		LINC01094
		AC002546.1
		SOX9-AS1
		AL691482.3
		LINC01235
		AC092801.1
		AC091057.1
		AC022509.3
		lncRNAs
		AF178030.1
		AC068580.3
		AL513283.1
		LINC02446
		AL356311.1
		AC068580.1
		AL139393.2
		AC138696.2
		AL121760.1
		AL031316.1
		AC004687.1
		TRBV11-2
		THEIR
		43
		AC024075.1
		AC121757.1
		AC124312.5
		AC012073.1
		AC106782.2
		SNHG26
		AP001528.2
		AC008115.3
		AC109361.2
		HCG11
		AC112721.2
		MIR99AHG
		DLEU2
		AC006329.1
		AL121790.2
		AC016888.1
		MEG3
		USP30-AS1
		AC025259.3
		LINC01929
		MIAT
		LINC01705
		LINC01094
		AC002546.1
		SOX9-AS1
		AL691482.3
		LINC01235
		AC092801.1
		AC091057.1
		AC022509.3
		lncRNAs
		AF178030.1
		AC068580.3
		AL513283.1
		LINC02446
		AL356311.1
		AC068580.1
		AL139393.2
		AC138696.2
		AL121760.1
		AL031316.1
		AC004687.1
		TRBV11-2
		THEIR
		43
		AC024075.1
		AC121757.1
		AC124312.5
		AC012073.1
		AC106782.2
		SNHG26
		AP001528.2
		AC008115.3
		AC109361.2
		HCG11
		AC112721.2
		MIR99AHG
		DLEU2
		AC006329.1
		AL121790.2
		AC016888.1
		MEG3
		USP30-AS1
		AC025259.3
		LINC01929
		MIAT
		LINC01705
		LINC01094
		AC002546.1
		SOX9-AS1
		AL691482.3
		LINC01235
		AC092801.1
		AC091057.1
		AC022509.3
		lncRNAs
		AF178030.1
		AC068580.3
		AL513283.1
		LINC02446
		AL356311.1
		AC068580.1
		AL139393.2
		AC138696.2
		AL121760.1
		AL031316.1
		AC004687.1
		TRBV11-2
		THEIR
		43
		AC024075.1
		AC121757.1
		AC124312.5
		AC012073.1
		AC106782.2
		SNHG26
		AP001528.2
		AC008115.3
		AC109361.2
		HCG11
		AC112721.2
		MIR99AHG
		DLEU2
		AC006329.1
		AL121790.2
		AC016888.1
		MEG3
		USP30-AS1
		AC025259.3
		LINC01929
		MIAT
		LINC01705
		LINC01094
		AC002546.1
		SOX9-AS1
		AL691482.3
		LINC01235
		AC092801.1
		AC091057.1
		AC022509.3
		lncRNAs
		AF178030.1
		AC068580.3
		AL513283.1
		LINC02446
		AL356311.1
		AC068580.1
		AL139393.2
		AC138696.2
		AL121760.1
		AL031316.1
		AC004687.1
		TRBV11-2
		THEIR
		43
		AC024075.1
		AC121757.1
		AC124312.5
		AC012073.1
		AC106782.2
		SNHG26
		AP001528.2
		AC008115.3
		AC109361.2
		HCG11
		AC112721.2
		MIR99AHG
		DLEU2
		AC006329.1
		AL121790.2
		AC016888.1
		MEG3
		USP30-AS1
		AC025259.3
		LINC01929
		MIAT
		LINC01705
		LINC01094
		AC002546.1
		SOX9-AS1
		AL691482.3
		LINC01235
		AC092801.1
		AC091057.1
[truncated: 1,004 more rows]

## Sheet: DEHmRNAs
Differentially expressed hypoxia-related mRNAs in the co-expression network
Overlapped	Current research	Zhao et al.
13	36	49
SIAH2	PYGM	MMP13
TPD52	DCN	FN1
MIF	PCK1	NT5E
FOS	IER3	COL5A2
COL5A1	COL5A1	LRP1
EFNA1	CAV1	THBS2
CXCR4	ZFP36	COL5A1
JUN	TPD52	PLAU
CA12	FOS	HLA-DQB1
NR3C1	CCN5	LEP
GAPDH	CXCR4	SIRPA
IL6	SIAH2	KDR
PLAUR	AKAP12	TEK
	FBP1	EPAS1
	SERPINE1	ABCB1
	BGN	CTSD
	MIF	PLAUR
	IL6	MET
	CAVIN1	HGF
	CA12	ADM
	PLAUR	CA9
	GAPDH	PFKFB4
	NR3C1	KRT19
	TPI1	KRT18
	ENO2	EGR1
	JUN	NR3C1
	SRPX	LRP8
	EFNA1	JUN
	CCN1	CA12
		TAGLN
		FKBP4
		SIAH2
		CXCR4
		PPARA
		MIF
		FOS
		NR4A1
		ANXA1
		CCL2
		IL6
		ALDH1A3
		EFNA1
		CDK1
		GAPDH
		TPD52
		SPP1
		TXNIP
		BHLHE41
